# Supplementary material for: Scoping ‘sex’ and ‘gender’ in rehabilitation: (mis)representations and effects
Source: Int J Equity Health. 2022 Dec 16;21:179. doi: 10.1186/s12939-022-01787-1 (PMC9756604; doi:10.1186/s12939-022-01787-1)
Supplement: Supplementary file 2 — Additional file 2. [file 12939_2022_1787_MOESM2_ESM.xlsx]

## Sheet: Sheet1
Author(s)	Title	Year	Journal	Type of article	Country	Type of rehabilitation	Methods	Participants/Target	Number of participants/sample size	Aim of study/paper	Did the article reflect an understanding of sex and gender (score of at least 3 out of 4 Ns)	1. Are the terms sex and gender used interchangeably?	2. Are the terms sex and/or gender used with a limited and binary scope?	3. Are sex and/or gender undefined?	4. Are the terms woman/man and female/male used interchangeably?	Rehabilitation needs (RN)	Rehabilitation access and uptake (RAU)	Rehabilitation experiences (RE)	Rehabilitation adherence (RA)	Assistive technology (AT)	Health systems (HS) (providers, equipment, facilities)	Rehabilitation outcomes (RO) (health, wellbeing, clinical)	Post-rehabilitation functioning (PRF) (return to work, caregiving, socializing, etc.)	Experiences of caregivers (EC)	Other (O)	Notes
